# Supplementary material for: Hypolipidemic activity of Taraxacum mongolicum associated with the activation of AMP-activated protein kinase in human HepG2 cells
Source: Royal Society of Chemistry journal article supplement (doi:10.1039/c4fo00183d), 2014-05-12
Supplement: c4fo00183d1.pdf [file c4fo00183d1.pdf]

**Figure S1**

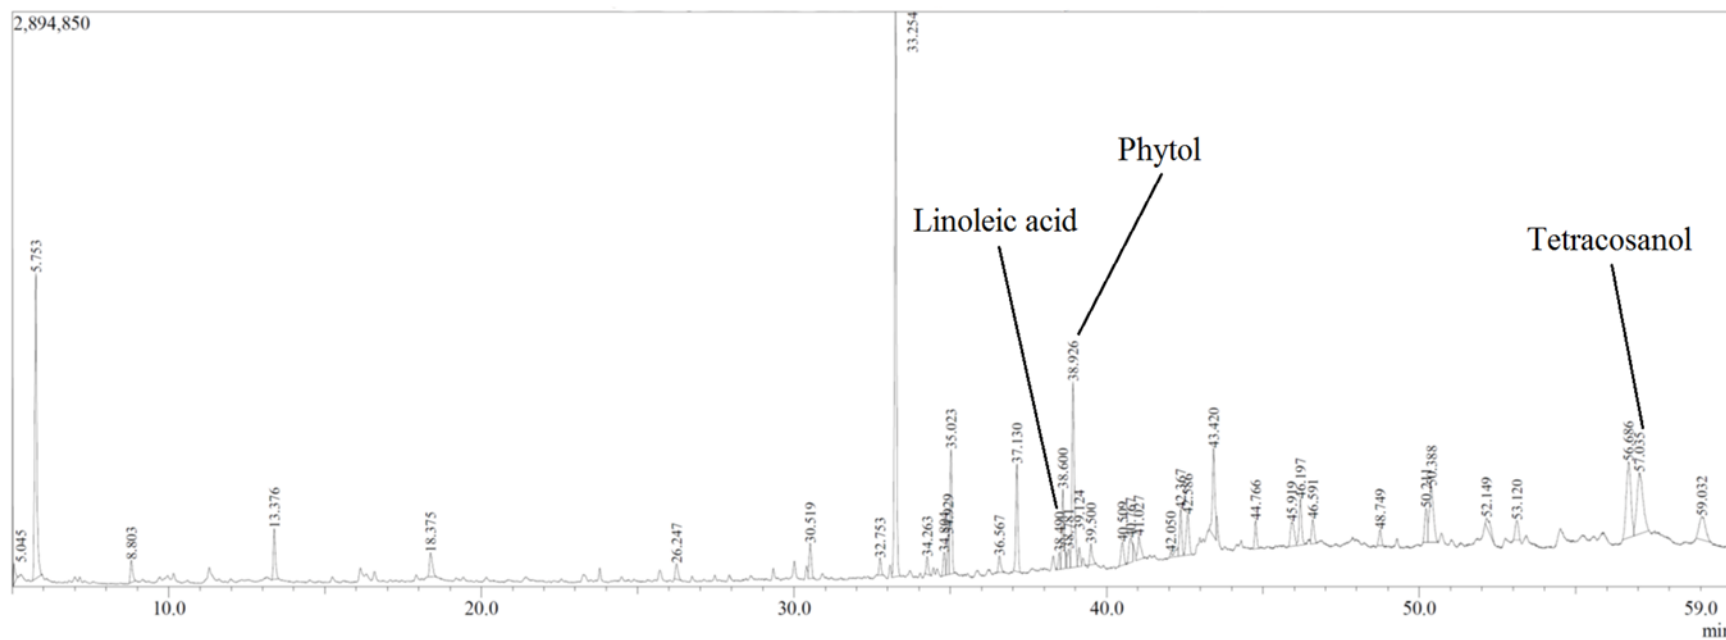

Figure S1. Gas chromatogram of TM-4. The three peaks of linoleic acid, phytol and tetracosanol are indicated, and retention time (min) of three compounds is 38.490, 38.926 and 57.035 min, respectively.
